# Supplementary material
Source: MDPI journal article supplement (https://www.mdpi.com/2073-4395/11/6/1248)
Supplement: s1 [file s1]

**Supplementary Figure 1.** KEGG pathways to which the DEGs were enriched in susceptible (XL19) and tolerant (ZYM1288) hulless barley.

|        |        |        |        |         |                                                       |
|--------|--------|--------|--------|---------|-------------------------------------------------------|
| 3.00   | 5.00   | 5.00   | 4.00   | ko00250 | Alanine, aspartate and glutamate metabolism           |
| 21.00  | 18.00  | 31.00  | 30.00  | ko00520 | Amino sugar and nucleotide sugar metabolism           |
| 6.00   | 6.00   | 8.00   | 13.00  | ko00330 | Arginine and proline metabolism                       |
| 250.00 | 190.00 | 298.00 | 300.00 | ko01110 | Biosynthesis of secondary metabolites                 |
| 3.00   | 5.00   | 6.00   | 9.00   | ko00905 | Brassinosteroid biosynthesis                          |
| 13.00  | 8.00   | 17.00  | 11.00  | ko00710 | Carbon fixation in photosynthetic organisms           |
| 9.00   | 7.00   | 13.00  | 15.00  | ko00906 | Carotenoid biosynthesis                               |
| 12.00  | 5.00   | 14.00  | 15.00  | ko04712 | Circadian rhythm - plant                              |
| 5.00   | 2.00   | 4.00   | 3.00   | ko00020 | Citrate cycle (TCA cycle)                             |
| 10.00  | 2.00   | 9.00   | 4.00   | ko00904 | Diterpenoid biosynthesis                              |
| 9.00   | 7.00   | 11.00  | 12.00  | ko00071 | Fatty acid degradation                                |
| 6.00   | 2.00   | 4.00   | 3.00   | ko00062 | Fatty acid elongation                                 |
| 22.00  | 23.00  | 23.00  | 24.00  | ko00941 | Flavonoid biosynthesis                                |
| 11.00  | 13.00  | 16.00  | 17.00  | ko00052 | Galactose metabolism                                  |
| 4.00   | 3.00   | 4.00   | 3.00   | ko00966 | Glucosinolate biosynthesis                            |
| 23.00  | 16.00  | 28.00  | 34.00  | ko00480 | Glutathione metabolism                                |
| 12.00  | 10.00  | 18.00  | 19.00  | ko00260 | Glycine, serine and threonine metabolism              |
| 15.00  | 9.00   | 19.00  | 16.00  | ko00562 | Inositol phosphate metabolism                         |
| 3.00   | 2.00   | 3.00   | 3.00   | ko00943 | Isoflavonoid biosynthesis                             |
| 2.00   | 2.00   | 3.00   | 2.00   | ko00540 | Lipopolysaccharide biosynthesis                       |
| 6.00   | 2.00   | 3.00   | 3.00   | ko00300 | Lysine biosynthesis                                   |
| 40.00  | 21.00  | 54.00  | 51.00  | ko04016 | MAPK signaling pathway - plant                        |
| 8.00   | 7.00   | 8.00   | 10.00  | ko00902 | Monoterpenoid biosynthesis                            |
| 4.00   | 4.00   | 5.00   | 6.00   | ko00910 | Nitrogen metabolism                                   |
| 12.00  | 4.00   | 9.00   | 6.00   | ko00030 | Pentose phosphate pathway                             |
| 15.00  | 10.00  | 14.00  | 12.00  | ko00360 | Phenylalanine metabolism                              |
| 14.00  | 12.00  | 17.00  | 15.00  | ko00400 | Phenylalanine, tyrosine and tryptophan biosynthesis   |
| 8.00   | 1.00   | 2.00   | 5.00   | ko00195 | Photosynthesis                                        |
| 2.00   | 1.00   | 6.00   | 3.00   | ko00196 | Photosynthesis - antenna proteins                     |
| 46.00  | 22.00  | 63.00  | 64.00  | ko04075 | Plant hormone signal transduction                     |
| 124.00 | 80.00  | 119.00 | 134.00 | ko04626 | Plant-pathogen interaction                            |
| 10.00  | 8.00   | 9.00   | 18.00  | ko00230 | Purine metabolism                                     |
| 11.00  | 9.00   | 10.00  | 15.00  | ko00240 | Pyrimidine metabolism                                 |
| 2.00   | 2.00   | 2.00   | 3.00   | ko00909 | Sesquiterpenoid and triterpenoid biosynthesis         |
| 43.00  | 29.00  | 51.00  | 64.00  | ko00500 | Starch and sucrose metabolism                         |
| 12.00  | 13.00  | 20.00  | 13.00  | ko00945 | Stilbenoid, diarylheptanoid and gingerol biosynthesis |
| 5.00   | 5.00   | 8.00   | 10.00  | ko00900 | Terpenoid backbone biosynthesis                       |
| 195.00 | 153.00 | 231.00 | 270.00 | ko04620 | Toll-like receptor signaling pathway                  |
| 8.00   | 10.00  | 16.00  | 13.00  | ko02020 | Two-component system                                  |
| 17.00  | 7.00   | 11.00  | 9.00   | ko00350 | Tyrosine metabolism                                   |
| 2.00   | 3.00   | 4.00   | 2.00   | ko00290 | Valine, leucine and isoleucine biosynthesis           |
| 9.00   | 5.00   | 14.00  | 11.00  | ko00908 | Zeatin biosynthesis                                   |
| 5 hr   | 12 hr  | 24 hr  | 36 hr  |         |                                                       |
